# Supplementary material
Source: MDPI journal article supplement (https://www.mdpi.com/2073-4441/15/12/2252)
Supplement: s1 [file s1]

Supplementary Materials for:

# Bacillariophyta in Hypersaline Waters of the Crimean Peninsula and the World

Daria Balycheva, Elena Anufriieva \*, Raisa Lee, Alexander Prazukin and Nickolai Shadrin

*A.O. Kovalevsky Institute of Biology of the Southern Seas of RAS, 2 Nakhimov ave., 299011, Sevastopol, Russia; dashik8@gmail.com (D.B.); lina\_anufriieva@mail.ru (E.A.); raisa-lee@yandex.ru (R.L.); prazukin@mail.ru (A.P.); snickolai@yandex.ru (N.S.)*

\*Correspondence: [lena\\_anufriieva@mail.ru](mailto:lena_anufriieva@mail.ru); Tel. +7 (8692) 54-55-50

Table S1. Diatoms of hypersaline water bodies of the world

[illegible]

|    |                                                                   |     |   |   |  |   |  |  |  |   |   |   |   |   |   |  |   |   |   |   |   |  |          |
|----|-------------------------------------------------------------------|-----|---|---|--|---|--|--|--|---|---|---|---|---|---|--|---|---|---|---|---|--|----------|
| 15 | <i>A. splendens</i> (Shadbolt) Ralfs 1861                         | 98  |   |   |  |   |  |  |  |   |   |   |   |   |   |  |   |   |   | + |   |  |          |
| 16 | <i>Amphitetras antediluviana</i> Ehrenberg 1840                   | 90  | + |   |  |   |  |  |  |   |   |   |   |   |   |  |   |   |   |   |   |  |          |
| 17 | <i>Amphora abludens</i> Simonsen 1960                             | 67  |   |   |  |   |  |  |  |   |   |   |   |   |   |  |   |   |   | + |   |  |          |
| 18 | <i>A. angusta</i> W.Gregory 1857                                  | 272 |   |   |  |   |  |  |  | + |   |   | + | * |   |  |   |   |   |   |   |  |          |
| 19 | <i>A. bigibbosa</i> Cleve 1895                                    | 63  |   |   |  |   |  |  |  |   |   |   |   |   |   |  |   |   |   | * |   |  |          |
| 20 | <i>A. copulata</i> (Kützing) Schoeman et R.E.M.Archibald 1986     | 66  |   |   |  |   |  |  |  |   |   | + |   |   |   |  |   |   |   |   |   |  | +<br>cf. |
| 21 | <i>A. crassa</i> W.Gregory 1857                                   | 131 |   |   |  |   |  |  |  |   |   | + |   |   |   |  |   |   |   |   |   |  |          |
| 22 | <i>A. cymbamphora</i> Cholnoky 1960                               | 53  |   |   |  |   |  |  |  |   |   |   | + | * | + |  |   |   |   |   |   |  |          |
| 23 | <i>A. delicatissima</i> Krasske 1930                              | 140 |   |   |  |   |  |  |  |   | + |   |   |   |   |  |   | + | + |   |   |  |          |
| 24 | <i>A. delicatula</i> Bljulina 1959                                | 259 |   |   |  |   |  |  |  |   | + |   |   |   |   |  |   |   |   |   |   |  |          |
| 25 | <i>A. holsaticoides</i> T.Nagumo et H.Kobayasi 1990               | –   |   |   |  |   |  |  |  |   |   | + |   |   |   |  |   |   |   |   |   |  |          |
| 26 | <i>A. libyca</i> Ehrenberg 1841                                   | 98  |   |   |  |   |  |  |  |   |   | + |   |   |   |  |   |   |   | + |   |  |          |
| 27 | <i>A. macilenta</i> var. <i>maeotica</i> Proshkina- Lavrenko 1963 | 87  | + |   |  |   |  |  |  |   |   |   |   |   |   |  |   |   |   |   |   |  |          |
| 28 | <i>A. micrometra</i> M.H.Giffen 1967                              | 52  |   |   |  |   |  |  |  |   |   |   | + | * |   |  |   |   |   |   |   |  |          |
| 29 | <i>A. obtusa</i> W.Gregory 1857                                   | 62  |   |   |  |   |  |  |  |   |   |   |   |   |   |  |   |   |   | * |   |  |          |
| 30 | <i>A. ostrearia</i> Brébisson ex Kützing 1849                     | –   |   |   |  |   |  |  |  |   |   | + |   |   |   |  |   |   |   |   |   |  |          |
| 31 | <i>A. ovalis</i> (Kützing) Kützing 1844                           | 290 | + |   |  | + |  |  |  | + |   | + |   |   |   |  |   | + |   |   |   |  |          |
| 32 | <i>A. pediculus</i> (Kützing) Grunow 1875                         | 91  |   |   |  |   |  |  |  |   |   | + |   |   |   |  |   |   |   |   |   |  |          |
| 33 | <i>A. proteus</i> W.Gregory 1857                                  | 134 |   | + |  |   |  |  |  |   |   | + |   |   |   |  | + |   |   |   |   |  |          |
| 34 | <i>A. pusio</i> Cleve 1895                                        | 75  |   |   |  |   |  |  |  |   |   | + |   |   |   |  |   |   |   |   |   |  |          |
| 35 | <i>A. richardiana</i> Cholnoky 1968                               | 205 |   |   |  |   |  |  |  |   |   |   |   |   |   |  |   |   |   |   | + |  |          |
| 36 | <i>A. robusta</i> W.Gregory 1857                                  | 63  |   |   |  |   |  |  |  |   |   |   |   |   |   |  |   |   | * |   |   |  |          |
| 37 | <i>A. spectabilis</i> W.Gregory 1857                              | 98  |   |   |  |   |  |  |  |   |   |   |   |   |   |  |   |   |   | + |   |  |          |
| 38 | <i>Amphiprora pseudoduplex</i> (Osada et Kobayasi) Hällfors 2004  | –   |   |   |  |   |  |  |  |   |   |   |   |   | + |  |   |   |   |   |   |  |          |
| 39 | <i>Aneumastus stroesei</i> (Østrup) D.G.Mann 1990                 | –   |   |   |  |   |  |  |  |   |   | + |   |   |   |  |   |   |   |   |   |  |          |
| 40 | <i>A. tusculus</i> (Ehrenberg) D.G.Mann et A.J.Stickle 1990       | –   |   |   |  |   |  |  |  |   |   | + |   |   |   |  |   |   |   |   |   |  |          |
| 41 | <i>Anomoeoneis costata</i> (Kützing) Hustedt 1959                 | 95  |   |   |  |   |  |  |  |   |   |   |   |   |   |  | + | * |   |   |   |  |          |

[illegible]

|    |                                                                                          |     |   |   |   |  |  |   |   |   |   |   |   |   |   |  |   |   |   |  |   |   |   |   |   |  |
|----|------------------------------------------------------------------------------------------|-----|---|---|---|--|--|---|---|---|---|---|---|---|---|--|---|---|---|--|---|---|---|---|---|--|
| 67 | <i>C. ventricosa</i> F.Meister 1912                                                      | –   |   |   |   |  |  |   |   |   |   |   |   |   |   |  | + |   |   |  |   |   |   |   |   |  |
| 68 | <i>Campylodiscus bicostatus</i> W.Smith ex Roper 1854                                    | 240 |   |   |   |  |  |   |   |   | + |   |   |   |   |  |   |   |   |  |   |   |   |   |   |  |
| 69 | <i>C. clypeus</i> (Ehrenberg) Ehrenberg ex Kützing 1844                                  | 240 |   |   |   |  |  |   |   |   | + |   |   |   |   |  |   |   |   |  |   |   |   |   |   |  |
| 70 | <i>C. echeneis</i> Ehrenberg ex Kützing 1844                                             | 240 |   |   |   |  |  |   |   |   | + |   |   |   |   |  |   |   |   |  |   |   |   |   |   |  |
| 71 | <i>C. neofastuosus</i> Ruck et Nakov in Ruck et al. 2016                                 | 272 |   | + | + |  |  |   |   |   | + |   | + |   |   |  |   |   |   |  |   | + |   |   |   |  |
| 72 | <i>C. schmidtii</i> Grunow in Schmidt et al. 1875                                        | 98  |   |   |   |  |  |   |   |   |   |   |   |   |   |  |   |   |   |  |   | + |   |   |   |  |
| 73 | <i>Campylostylus striatus</i> Shadbolt ex Van Heurck 1896                                | 50  |   |   |   |  |  |   |   |   |   |   |   |   |   |  | + |   |   |  |   |   |   |   |   |  |
| 74 | <i>Catenula adhaerens</i> (Mereschkowsky) Mereschkowsky 1903                             | 70  |   |   |   |  |  |   |   |   |   | + |   |   |   |  |   |   |   |  |   | + |   |   |   |  |
| 75 | <i>Chaetoceros minimus</i> (Levander) D.Marino, G.Giuffre, M.Montresor et A.Zingone 1991 | 290 | + |   |   |  |  | + | + |   |   |   |   |   |   |  |   |   |   |  |   |   |   |   |   |  |
| 76 | <i>C. muelleri</i> Lemmermann 1898                                                       | 124 |   |   |   |  |  |   |   |   |   |   |   |   |   |  |   | + | * |  |   |   |   | + |   |  |
| 77 | <i>C. simplex</i> Ostenfeld 1902                                                         | 290 | + |   |   |  |  |   |   |   |   |   |   |   |   |  |   |   |   |  |   |   |   |   |   |  |
| 78 | <i>Chamaepinnularia clamans</i> (Hustedt) Witkowski, Lange-Bertalot et Metzeltin 2000    | 140 |   |   |   |  |  |   |   |   |   |   |   |   |   |  |   |   |   |  | + |   |   |   |   |  |
| 79 | <i>Climaconeis inflexa</i> (Brébisson ex Kützing) E.J.Cox 1982                           | 110 |   |   | + |  |  |   |   |   |   |   |   |   |   |  |   |   |   |  |   |   |   |   |   |  |
| 80 | <i>C. scopulorioides</i> (Hustedt) E.J.Cox 1982                                          | 65  |   |   |   |  |  |   |   |   |   |   |   | + | * |  |   |   |   |  |   | + | * |   |   |  |
| 81 | <i>Climacosphenia moniligera</i> Ehrenberg 1843                                          | 98  |   |   |   |  |  |   |   |   |   |   |   |   |   |  |   |   |   |  |   |   | + |   |   |  |
| 82 | <i>Cocconeis costata</i> W.Gregory 1855                                                  | 94  | + |   |   |  |  |   |   |   |   |   |   |   |   |  |   |   |   |  |   |   |   |   | + |  |
| 83 | <i>C. fasciolata</i> (Ehrenberg) N.E.Brown 1920                                          | 95  |   |   |   |  |  |   |   |   |   |   |   |   |   |  |   |   |   |  |   |   |   |   | + |  |
| 84 | <i>C. dirupta</i> W.Gregory 1857                                                         | 75  |   |   |   |  |  |   |   |   |   |   |   | + |   |  |   |   |   |  |   |   |   |   |   |  |
| 85 | <i>C. distans</i> W.Gregory 1855                                                         | –   |   |   |   |  |  |   |   |   |   |   |   |   |   |  | + |   |   |  |   |   |   |   |   |  |
| 86 | <i>C. kujalnitzkensis</i> Gusliakov et Gerasimiuk 1992                                   | 110 | + | + | + |  |  | + |   | + |   |   |   |   |   |  |   |   |   |  |   |   |   |   |   |  |
| 87 | <i>C. lineata</i> Ehrenberg 1849                                                         | 272 |   |   |   |  |  |   |   |   | + |   | + |   |   |  |   |   |   |  |   |   |   |   |   |  |
| 88 | <i>C. lyra</i> A.W.F.Schmidt 1874                                                        | 98  |   |   |   |  |  |   |   |   |   |   |   |   |   |  |   |   |   |  |   |   | + |   |   |  |
| 89 | <i>C. neodiminuta</i> Krammer 1990                                                       | 70  |   |   |   |  |  |   |   |   |   |   |   |   |   |  |   |   |   |  |   | + |   |   |   |  |
| 90 | <i>C. neothumensis</i> Krammer 1990                                                      | –   |   |   |   |  |  |   |   |   |   | + |   |   |   |  |   |   |   |  |   |   |   |   |   |  |
| 91 | <i>C. pediculus</i> Ehrenberg 1838                                                       | 272 |   |   | + |  |  |   |   | + | + |   |   |   |   |  |   |   |   |  | + |   |   |   |   |  |

|     |                                                                                 |     |   |   |   |   |   |   |   |   |   |   |   |   |   |   |   |   |   |   |   |   |  |
|-----|---------------------------------------------------------------------------------|-----|---|---|---|---|---|---|---|---|---|---|---|---|---|---|---|---|---|---|---|---|--|
| 92  | <i>C. placentula</i> Ehrenberg 1838 var. <i>placentula</i>                      | 160 | + | + |   |   |   |   |   | + |   |   | + | + |   | + |   | + | * |   |   |   |  |
| 93  | <i>C. placentula</i> var. <i>euglypta</i> (Ehrenberg) Cleve 1895                | 290 | + | + |   |   | + | + |   | + | + |   | + |   |   |   |   |   | + |   |   |   |  |
| 94  | <i>C. pseudomarginata</i> W.Gregory 1857                                        | 62  |   |   |   |   |   |   |   |   |   |   |   |   |   |   |   |   | * |   |   |   |  |
| 95  | <i>C. scutellum</i> Ehrenberg 1838 var. <i>scutellum</i>                        | 240 | + | + | + |   |   | + |   | + | + | + | + |   |   |   |   |   | * | + |   |   |  |
| 96  | <i>C. scutellum</i> var. <i>adjuncta</i> A. Schmidt 1874                        | 240 |   |   | + |   |   |   |   | + |   |   |   |   |   |   |   |   |   |   |   |   |  |
| 97  | <i>Conticribra weissflogii</i> (Grunow) Stachura-Suchoples et D.M.Williams 2009 | –   |   |   |   |   |   |   |   |   |   |   |   |   | + |   |   |   |   |   |   |   |  |
| 98  | <i>Coronia daemeliana</i> (Grunow) Ruck et Guiry 2016                           | 240 |   | + | + |   |   |   |   | + |   |   |   |   |   |   |   |   |   |   |   |   |  |
| 99  | <i>Coscinodiscus asteromphalus</i> Ehrenberg 1844                               | 98  |   |   |   |   |   |   |   |   |   |   |   |   |   |   |   |   |   | + |   |   |  |
| 100 | <i>C. decrescens</i> Grunow 1878                                                | 65  |   |   |   |   |   |   |   |   |   |   |   |   |   |   |   |   |   |   | + |   |  |
| 101 | <i>C. radiatus</i> Ehrenberg 1840                                               | 272 |   |   |   |   |   |   |   | + |   |   |   |   |   |   |   |   |   | + |   |   |  |
| 102 | <i>Craticula halophila</i> (Grunow) D.G.Mann 1990                               | 101 |   |   |   |   |   |   |   |   |   |   |   |   |   |   |   | + | + |   |   |   |  |
| 103 | <i>Ctenophora pulchella</i> (Ralfs ex Kützing) D.M.Williams et Round 1986       | 130 |   |   |   |   |   |   |   |   |   |   | + |   |   |   |   |   |   |   |   | + |  |
| 104 | <i>Cyclotella choctawhatcheeana</i> Prasad 1990                                 | 174 | + |   |   |   |   |   | + |   |   |   |   |   |   |   |   |   |   |   | + |   |  |
| 105 | <i>C. litoralis</i> Lange et Syvertsen 1989                                     | 205 |   |   |   |   |   |   |   |   |   |   |   |   |   |   |   |   |   |   | + |   |  |
| 106 | <i>C. meneghiniana</i> Kützing 1844                                             | 272 |   |   |   |   |   |   |   | + |   | + |   |   | + |   |   |   |   |   |   |   |  |
| 107 | <i>C. operculata</i> (C.Agardh) Kützing 1844                                    | –   |   |   |   |   |   |   |   |   |   |   |   |   |   |   | + |   |   |   |   |   |  |
| 108 | <i>C. striata</i> (Kützing) Grunow 1880                                         | 61  |   |   |   |   |   |   | + |   |   |   |   |   |   |   | + |   | * |   |   |   |  |
| 109 | <i>C. stylorum</i> Brightwell 1860                                              | 98  |   |   |   |   |   |   |   |   |   |   |   |   |   |   |   |   | * | + |   |   |  |
| 110 | <i>C. quillensis</i> L.W.Bailey 1922                                            | 110 |   |   |   |   |   |   |   |   |   |   |   |   |   |   |   |   |   |   |   | + |  |
| 111 | <i>Cylindrotheca closterium</i> (Ehrenberg) Reimann et Lewin 1964               | 272 | + | + |   |   | + |   | + | + |   | + | + |   |   |   |   |   |   |   |   |   |  |
| 112 | <i>C. gracilis</i> (Brébisson ex Kützing) Grunow 1882                           | –   |   |   |   |   |   |   |   |   |   | + |   |   |   |   |   |   |   |   |   |   |  |
| 113 | <i>Cymbella angusta</i> (Gregory) Gusliakov 1992                                | 320 |   |   | + | + | + |   |   |   |   |   |   |   |   |   |   |   |   |   |   |   |  |
| 114 | <i>C. aspera</i> (Ehrenberg) Cleve 1894                                         | –   |   |   |   |   |   |   | + |   |   |   |   |   |   |   | + |   |   |   |   |   |  |
| 115 | <i>C. cymbiformis</i> C.Agardh 1830                                             | –   |   |   |   |   |   |   |   |   |   |   |   |   |   |   | + |   |   |   |   |   |  |
| 116 | <i>C. lanceolata</i> C.Agardh 1830                                              | –   |   |   |   |   |   |   |   |   |   |   |   |   |   |   |   | + |   |   |   |   |  |

|     |                                                                    |     |   |   |   |   |   |  |   |   |  |   |   |  |  |   |                     |   |  |   |   |   |   |
|-----|--------------------------------------------------------------------|-----|---|---|---|---|---|--|---|---|--|---|---|--|--|---|---------------------|---|--|---|---|---|---|
| 117 | <i>Denticula elegans</i> Kützing 1844                              | –   |   |   |   |   |   |  |   |   |  |   |   |  |  |   |                     | + |  |   |   |   |   |
| 118 | <i>D. kuetzingii</i> Grunow 1862                                   | 98  |   |   |   |   |   |  |   |   |  |   |   |  |  |   |                     |   |  | + |   |   |   |
| 119 | <i>D. subtilis</i> Grunow 1862                                     | –   |   |   |   |   |   |  |   |   |  |   | + |  |  |   |                     |   |  |   |   |   |   |
| 120 | <i>D. tenuis</i> Kützing 1844                                      | –   |   |   |   |   |   |  |   |   |  |   |   |  |  |   |                     | + |  |   |   |   |   |
| 121 | <i>D. thermalis</i> Kützing 1844                                   | 50  |   |   |   |   |   |  |   |   |  |   |   |  |  | + | s<br>p-<br>aff<br>. | + |  |   |   |   |   |
| 122 | <i>D. valida</i> (Pedicino) Grunow 1885                            | 316 |   |   |   |   |   |  |   |   |  |   |   |  |  |   |                     |   |  |   |   | + |   |
| 123 | <i>Diadesmis confervacea</i> Kützing 1844                          | –   |   |   |   |   |   |  |   |   |  |   | + |  |  |   |                     |   |  |   |   |   |   |
| 124 | <i>Diatoma tenuis</i> C.Agardh 1812                                | –   |   |   |   |   |   |  |   |   |  |   | + |  |  |   |                     |   |  |   |   |   |   |
| 125 | <i>D. vulgaris</i> Bory de Saint-Vincent 1824                      | 110 |   |   |   |   |   |  |   |   |  | + |   |  |  |   |                     |   |  |   |   |   |   |
| 126 | <i>Dickieia subinflata</i> (Grunow) D.G.Mann 1994                  | 110 | + | + |   |   | + |  | + |   |  |   |   |  |  |   |                     |   |  |   |   |   |   |
| 127 | <i>Diploneis chersonensis</i> (Grunow) Cleve in A.W.F.Schmidt 1892 | 325 |   | + |   | + |   |  |   |   |  |   |   |  |  |   |                     |   |  |   |   |   |   |
| 128 | <i>D. bombus</i> (Ehrenberg) Ehrenberg 1894                        | 272 |   | + | + |   |   |  |   | + |  |   |   |  |  |   |                     |   |  |   |   |   |   |
| 129 | <i>D. decipiens</i> A.Cleve 1915                                   | 55  |   |   |   |   |   |  |   |   |  |   | + |  |  |   |                     |   |  |   |   |   |   |
| 130 | <i>D. didyma</i> (Ehrenberg) Ehrenberg 1839                        | 272 |   |   |   |   |   |  |   | + |  | + |   |  |  |   |                     |   |  |   |   |   |   |
| 131 | <i>D. domblittensis</i> (Grunow) Cleve 1894                        | 240 |   |   |   |   |   |  |   | + |  |   |   |  |  |   |                     |   |  |   |   |   |   |
| 132 | <i>D. elliptica</i> (Kützing) Cleve 1894                           | –   |   |   |   |   |   |  |   |   |  |   |   |  |  |   | +                   |   |  |   |   |   |   |
| 133 | <i>D. littoralis</i> var. <i>clathrata</i> (Østrup) Cleve 1896     | 91  |   |   |   |   |   |  |   |   |  | + |   |  |  |   |                     |   |  |   |   |   |   |
| 134 | <i>D. interrupta</i> (Kützing) Cleve 1894                          | 98  |   |   |   |   |   |  |   |   |  | + |   |  |  |   |                     |   |  | + |   |   |   |
| 135 | <i>D. oblongella</i> (Nägeli ex Kützing) A.Cleve 1922              | 131 |   |   |   |   |   |  |   |   |  | + |   |  |  |   |                     |   |  |   |   |   |   |
| 136 | <i>D. ovalis</i> (Hilse) Cleve 1891                                | 91  |   |   |   |   |   |  |   |   |  | + |   |  |  |   |                     |   |  |   |   |   |   |
| 137 | <i>D. parma</i> Cleve 1891                                         | –   |   |   |   |   |   |  |   |   |  | + |   |  |  |   |                     |   |  |   |   |   |   |
| 138 | <i>D. smithii</i> (Brébisson) Cleve 1894                           | 272 |   |   |   |   |   |  |   | + |  | + |   |  |  |   |                     |   |  | + | + |   |   |
| 139 | <i>D. splendida</i> Cleve 1894                                     | 77  |   |   |   |   |   |  |   |   |  |   |   |  |  |   |                     |   |  | + |   |   | + |
| 140 | <i>D. suborbicularis</i> (W.Gregory) Cleve 1894                    | 98  |   |   |   |   |   |  |   |   |  |   |   |  |  |   |                     |   |  | + |   |   |   |
| 141 | <i>D. subovalis</i> Cleve 1894                                     | 98  |   |   |   |   |   |  |   |   |  |   |   |  |  |   |                     |   |  | + |   |   |   |
| 142 | <i>Encyonema minutum</i> (Hilse) D.G.Mann 1990                     | 95  |   |   |   |   |   |  |   |   |  |   |   |  |  |   | +                   |   |  |   |   |   |   |

|     |                                                                                                    |     |  |  |   |  |  |  |   |   |  |   |   |  |   |   |  |   |   |  |   |   |   |   |  |   |   |
|-----|----------------------------------------------------------------------------------------------------|-----|--|--|---|--|--|--|---|---|--|---|---|--|---|---|--|---|---|--|---|---|---|---|--|---|---|
|     |                                                                                                    |     |  |  |   |  |  |  |   |   |  |   |   |  |   |   |  |   | * |  |   |   |   |   |  |   |   |
| 143 | <i>Eucampia antarctica</i> (Castracane) Mangin 1915                                                | 66  |  |  |   |  |  |  |   |   |  |   |   |  |   |   |  |   |   |  |   |   |   |   |  |   | + |
| 144 | <i>Eunotia gracilis</i> W.Smith 1853                                                               | –   |  |  |   |  |  |  |   |   |  |   |   |  |   |   |  |   | + |  |   |   |   |   |  |   |   |
| 145 | <i>Entomoneis alata</i> (Ehrenberg) Ehrenberg 1845                                                 | 110 |  |  | + |  |  |  |   |   |  |   | + |  | + |   |  |   |   |  |   | + |   | + |  |   |   |
| 146 | <i>E. paludosa</i> (W.Smith) Reimer 1975                                                           | 131 |  |  |   |  |  |  | + |   |  | + |   |  | + |   |  |   |   |  | + |   | + |   |  |   |   |
| 147 | <i>E. tenuistriata</i> John 1983                                                                   | –   |  |  |   |  |  |  | + |   |  |   |   |  | + |   |  |   |   |  |   |   |   |   |  |   |   |
| 148 | <i>E. vertebralis</i> Clavero, Grimalt et Hernández-Mariné 1999                                    | 51  |  |  |   |  |  |  |   |   |  |   |   |  | + | * |  |   |   |  |   |   |   |   |  |   |   |
| 149 | <i>Envekadea pseudocrassirostris</i> (Hustedt) Van de Vijver, Gligora, Hinz, Kralj et Cocquyt 2009 | 65  |  |  |   |  |  |  |   |   |  |   |   |  |   |   |  |   |   |  |   |   | + |   |  |   |   |
| 150 | <i>Epithemia adnata</i> (Kützing) Brébisson 1838 var. <i>adnata</i>                                | 240 |  |  |   |  |  |  |   | + |  | + | + |  |   |   |  |   |   |  |   |   |   |   |  |   |   |
| 151 | <i>E. adnata</i> var. <i>saxonica</i> (Kützing) R.M.Patrick 1975                                   | –   |  |  |   |  |  |  |   |   |  |   |   |  |   |   |  |   | + |  |   |   |   |   |  |   |   |
| 152 | <i>E. argus</i> var. <i>alpestris</i> (W.Smith) Grunow 1860                                        | –   |  |  |   |  |  |  |   |   |  |   |   |  |   |   |  |   | + |  |   |   |   |   |  |   |   |
| 153 | <i>E. frickei</i> Krammer 1987                                                                     | –   |  |  |   |  |  |  |   |   |  |   |   |  |   |   |  |   | + |  |   |   |   |   |  |   |   |
| 154 | <i>E. sorex</i> Kützing 1844 var. <i>sorex</i>                                                     | 240 |  |  |   |  |  |  |   | + |  | + |   |  |   |   |  |   | + |  |   |   |   |   |  |   |   |
| 155 | <i>E. sorex</i> var. <i>gracilis</i> Hustedt 1922                                                  | 99  |  |  |   |  |  |  |   |   |  |   |   |  |   |   |  |   | + |  |   |   |   |   |  |   |   |
| 156 | <i>E. turgida</i> (Ehrenberg) Kützing 1844                                                         | –   |  |  |   |  |  |  |   |   |  |   |   |  |   |   |  |   | + |  |   |   |   |   |  |   |   |
| 157 | <i>Fallacia cryptolyra</i> (Brockmann) Stickle et D.G.Mann 1990                                    | 66  |  |  |   |  |  |  |   |   |  |   |   |  |   |   |  |   |   |  |   |   | + |   |  |   |   |
| 158 | <i>F. forcipata</i> var. <i>densestriata</i> (A.W.F.Schmidt) Gogorev 2004                          | 99  |  |  |   |  |  |  |   |   |  | + |   |  |   |   |  |   |   |  |   |   |   |   |  |   |   |
| 159 | <i>F. pygmaea</i> (Kützing) Stickle et D.G.Mann 1990                                               | –   |  |  |   |  |  |  |   |   |  |   |   |  |   |   |  |   | + |  |   |   |   |   |  |   |   |
| 160 | <i>Fragilaria capucina</i> Desmazières 1830                                                        | 272 |  |  |   |  |  |  |   | + |  |   |   |  |   |   |  |   |   |  |   |   |   |   |  |   |   |
| 161 | <i>F. famelica</i> (Kützing) Lange-Bertalot 1980                                                   | 350 |  |  |   |  |  |  |   | + |  |   |   |  |   |   |  |   |   |  |   |   |   |   |  | + |   |
| 162 | <i>F. rumpens</i> (Kützing) G.W.F.Carlson 1913                                                     | 240 |  |  |   |  |  |  |   | + |  |   |   |  |   |   |  |   |   |  |   |   |   |   |  |   |   |
| 163 | <i>F. vaucheriae</i> (Kützing) J.B.Petersen 1938                                                   | 240 |  |  |   |  |  |  |   | + |  |   |   |  |   |   |  | + | * |  |   |   | + |   |  |   |   |
| 164 | <i>Fragilariopsis curta</i> (Van Heurck) Hustedt 1958                                              | 94  |  |  |   |  |  |  |   |   |  |   |   |  |   |   |  |   |   |  |   |   |   |   |  | + |   |
| 165 | <i>F. cylindrus</i> (Grunow ex Cleve) Helmcke et Krieger 1954                                      | 94  |  |  |   |  |  |  |   |   |  |   |   |  |   |   |  |   |   |  |   |   |   |   |  | + |   |
| 166 | <i>F. ritscheri</i> Hustedt 1958                                                                   | 94  |  |  |   |  |  |  |   |   |  |   |   |  |   |   |  |   |   |  |   |   |   |   |  | + |   |
| 167 | <i>Fragilariforma constricta</i> (Ehrenberg) D.M.Williams et Round 1988                            | 98  |  |  |   |  |  |  |   |   |  |   |   |  |   |   |  |   |   |  |   |   | + |   |  |   |   |

|     |                                                                                      |     |   |   |   |   |   |   |   |   |   |   |   |   |   |  |   |   |   |   |   |   |   |   |
|-----|--------------------------------------------------------------------------------------|-----|---|---|---|---|---|---|---|---|---|---|---|---|---|--|---|---|---|---|---|---|---|---|
| 168 | <i>Frustulia interposita</i> (Lewis) De Toni 1891                                    | 63  |   |   |   |   |   |   |   |   |   |   |   |   |   |  |   |   |   | * |   |   |   |   |
| 169 | <i>Giffenia cocconeiformis</i> (Grunow) Round et Basson 1997                         | 98  |   |   |   |   |   |   |   |   |   |   |   |   |   |  |   |   |   |   |   | + |   |   |
| 170 | <i>Glyphodesmis distans</i> (W.Gregory) Grunow in Van Heurck 1881                    | 110 |   | + |   |   |   |   |   |   |   |   |   |   |   |  |   |   |   |   |   |   |   |   |
| 171 | <i>Gogorevia exilis</i> (Kützing) Kulikovskiy et Kociolek in Kulikovskiy et al. 2020 | 79  | + |   |   |   |   |   |   |   |   |   | + |   |   |  |   |   |   |   |   |   |   |   |
| 172 | <i>Gomphonema hebridense</i> W.Gregory 1854                                          | 75  |   |   |   |   |   |   |   |   |   |   | + |   |   |  |   |   |   |   |   |   |   |   |
| 173 | <i>G. olivaceum</i> var. <i>salina</i> Grunow, 1878                                  | 98  |   |   |   |   |   |   |   |   |   |   |   |   |   |  |   |   |   |   | + |   |   |   |
| 174 | <i>G. parvulum</i> (Kützing) Kützing 1849                                            | 98  |   |   |   |   |   |   |   |   |   |   | + |   |   |  |   |   |   |   |   |   |   |   |
| 175 | <i>G. salinarum</i> (Pantosek) Cleve 1894                                            | 110 |   |   |   |   |   |   |   | + |   | + |   |   |   |  |   |   |   |   |   |   |   |   |
| 176 | <i>G. subclavatum</i> (Grunow) Grunow 1884                                           | 60  |   |   |   |   |   |   |   |   |   |   | + |   |   |  |   |   |   |   |   |   |   |   |
| 177 | <i>Grammatophora macilenta</i> W.Smith 1856                                          | 272 |   |   |   |   |   |   |   |   | + |   |   |   |   |  |   |   |   |   |   |   |   |   |
| 178 | <i>G. marina</i> (Lyngbye) Kützing 1844                                              | 272 | + | + |   |   |   |   |   |   | + |   |   |   |   |  |   |   |   |   | + |   |   |   |
| 179 | <i>G. undulata</i> Ehrenberg 1840                                                    | 98  |   |   |   |   |   |   |   | + |   |   |   |   |   |  |   |   |   |   | + |   |   |   |
| 180 | <i>Gyrosigma attenuatum</i> (Kützing) Rabenhorst 1853                                | 110 |   | + |   |   |   |   |   |   |   |   |   |   |   |  |   |   |   |   |   |   |   |   |
| 181 | <i>G. balticum</i> (Ehrenberg) Rabenhorst 1853                                       | 240 | + |   |   |   |   |   |   |   | + |   |   |   |   |  |   |   |   | * |   |   |   |   |
| 182 | <i>G. distortum</i> (W.Smith) J.W.Griffith et Henfrey 1856                           | 75  |   |   |   |   |   |   |   |   |   | + |   |   |   |  |   |   |   |   |   |   |   |   |
| 183 | <i>G. eximium</i> (Thwaites) Boyer 1927                                              | –   |   |   |   |   |   |   |   |   |   | + |   |   |   |  |   |   |   |   |   |   |   |   |
| 184 | <i>G. fasciola</i> (Ehrenberg) J.W.Griffith et Henfrey 1856                          | 56  | + |   |   |   |   |   |   |   |   |   |   |   |   |  |   |   |   |   |   |   |   |   |
| 185 | <i>G. fenestrata</i> Meister 1932                                                    | 100 |   |   |   |   |   |   |   |   |   | + |   |   |   |  |   |   |   |   |   |   |   |   |
| 186 | <i>G. littorale</i> (W.Smith) J.W.Griffith et Henfrey 1856                           | 60  |   |   |   |   |   |   |   |   |   |   | + |   |   |  |   |   |   |   |   |   |   |   |
| 187 | <i>G. procerum</i> Hustedt 1952                                                      | 174 |   |   |   |   |   |   |   |   |   |   |   |   |   |  |   |   |   |   |   | + |   |   |
| 188 | <i>G. scalproides</i> (Rabenhorst) Cleve 1894                                        | 65  |   |   |   |   |   |   |   |   |   | + |   |   |   |  |   |   |   | + |   |   |   |   |
| 189 | <i>G. spenceri</i> (Bailey ex Quekett) Griffith et Henfrey 1856                      | 65  |   |   |   |   |   |   |   |   |   |   |   |   |   |  |   |   |   | + |   |   |   |   |
| 190 | <i>Halamphora acutiuscula</i> (Kützing) Levkov 2009                                  | 361 |   |   |   |   |   |   |   | + |   |   | + |   | + |  |   |   |   | + | * |   | + | + |
| 191 | <i>H. cf. atacamae</i> (Frenguelli) Levkov 2009                                      | 205 |   |   |   |   |   |   |   |   |   |   |   |   |   |  |   |   |   |   |   | + |   |   |
| 192 | <i>H. coffeiformis</i> (C.Agardh) Mereschkowsky 1903                                 | 320 | + |   | + | + | + | + | + |   |   | + |   | + | + |  | + | + | + |   | + | * |   | + |



[illegible]

|     |                                                                                                     |     |   |   |   |  |  |   |  |  |   |  |   |   |   |   |   |                      |   |   |   |   |   |   |   |   |     |  |
|-----|-----------------------------------------------------------------------------------------------------|-----|---|---|---|--|--|---|--|--|---|--|---|---|---|---|---|----------------------|---|---|---|---|---|---|---|---|-----|--|
| 219 | <i>H. spicula</i> (Hickie) Bukhtiyarova 1995                                                        |     |   |   |   |  |  |   |  |  |   |  |   |   |   |   | + |                      |   |   |   |   |   |   |   |   |     |  |
| 220 | <i>H. stundlii</i> (Hustedt) Blanco, Borrego-Ramos et Olenici 2019                                  | 65  |   |   |   |  |  |   |  |  |   |  |   |   |   |   | + | +s<br>p.<br>aff<br>. |   |   |   |   |   | + | * |   |     |  |
| 221 | <i>Hippodonta capitata</i> (Ehrenberg) Lange-Bertalot, Metzeltin et Witkowski 1996                  | —   |   |   |   |  |  |   |  |  |   |  |   |   |   |   |   |                      |   |   |   |   |   |   |   | + |     |  |
| 222 | <i>Hippodonta hungarica</i> (Grunow) Lange-Bertalot, Metzeltin et Witkowski 1996                    | 112 |   |   |   |  |  |   |  |  |   |  |   |   |   |   |   |                      |   |   |   |   |   |   |   | + |     |  |
| 223 | <i>Karayevia ploenensis</i> (Hustedt) Bukhtiyarova 1999                                             | —   |   |   |   |  |  |   |  |  |   |  |   |   |   |   | + |                      |   |   |   |   |   |   |   |   |     |  |
| 224 | <i>Licmophora gracilis</i> (Ehrenberg) Grunow 1867                                                  | 248 |   |   |   |  |  |   |  |  | + |  |   |   |   |   |   |                      |   |   |   |   |   |   |   |   |     |  |
| 225 | <i>Lindavia bodanica</i> (Eulenstein ex Grunow) T.Nakov, Guillory, Julius, Theriot et Alverson 2015 | 95  |   |   |   |  |  |   |  |  | + |  |   |   |   |   |   |                      | + | * |   |   |   |   |   |   |     |  |
| 226 | <i>L. comta</i> (Kützing) T.Nakov et al. 2015                                                       | —   |   |   |   |  |  |   |  |  |   |  |   |   |   |   |   |                      |   |   | + |   |   |   |   |   |     |  |
| 227 | <i>Luticola murrayi</i> (West & G.S.West) D.G.Mann 1990                                             | 96  |   |   |   |  |  |   |  |  |   |  |   |   |   |   |   |                      |   |   |   |   |   |   |   | + | cf. |  |
| 228 | <i>L. mutica</i> (Kützing) D.G.Mann in Round, R.M.Crawford et D.G.Mann 1990                         | 75  |   |   |   |  |  |   |  |  |   |  |   | + |   | + |   |                      |   |   |   |   |   |   | + |   |     |  |
| 229 | <i>L. muticoides</i> (Hustedt) D.G.Mann 1990                                                        | 98  |   |   |   |  |  |   |  |  |   |  |   |   |   |   |   |                      |   |   |   |   |   | + |   |   |     |  |
| 230 | <i>L. muticopsis</i> (Van Heurck) D.G.Mann 1990                                                     | 83  |   |   |   |  |  |   |  |  |   |  |   |   |   |   |   |                      |   |   |   |   |   |   |   | + | cf. |  |
| 231 | <i>Lyrella hennedyi</i> (W.Smith) Stickle et D.G.Mann 1990                                          | 98  |   |   |   |  |  |   |  |  |   |  |   |   |   |   |   |                      |   |   |   |   |   | + |   |   |     |  |
| 232 | <i>L. lyra</i> (Ehrenberg) Karayeva 1978                                                            | 98  |   |   |   |  |  |   |  |  |   |  |   |   |   |   |   |                      |   |   |   |   |   | + |   |   |     |  |
| 233 | <i>L. lyroides</i> (Hendey) D.G. Mann 1990                                                          | 88  |   | + |   |  |  |   |  |  |   |  |   |   |   |   |   |                      |   |   |   |   |   |   |   |   |     |  |
| 234 | <i>Mastogloia angulata</i> F.W.Lewis 1861                                                           | 272 |   |   |   |  |  |   |  |  | + |  |   |   |   |   |   |                      |   |   |   |   |   |   |   |   |     |  |
| 235 | <i>M. aquilegiae</i> Grunow 1893                                                                    | 52  |   |   |   |  |  |   |  |  |   |  |   | + | * |   |   |                      |   |   |   |   |   |   |   |   |     |  |
| 236 | <i>M. baltica</i> Grunow 1880                                                                       | —   |   |   |   |  |  |   |  |  |   |  |   | + |   |   |   |                      |   |   |   |   |   |   |   |   |     |  |
| 237 | <i>M. braunii</i> Grunow 1863                                                                       | 240 | + | + | + |  |  | + |  |  | + |  |   |   |   |   |   |                      |   |   |   | + |   |   |   |   |     |  |
| 238 | <i>M. elliptica</i> (C.Agardh) Cleve 1893                                                           | 240 |   |   |   |  |  |   |  |  | + |  |   |   |   |   |   |                      |   |   |   |   |   |   |   |   |     |  |
| 239 | <i>M. lacustris</i> (Grunow) Grunow 1880                                                            | —   |   |   |   |  |  |   |  |  |   |  |   | + |   |   |   |                      |   |   |   |   |   |   |   |   |     |  |
| 240 | <i>M. lanceolata</i> Thwaites ex W.Smith 1856                                                       | 240 | + |   | + |  |  | + |  |  | + |  | + |   |   |   |   |                      |   |   |   |   | + |   |   |   |     |  |

[illegible]

|     |                                                           |     |   |   |   |   |   |   |   |   |   |   |   |   |   |   |                      |   |   |  |   |          |   |   |
|-----|-----------------------------------------------------------|-----|---|---|---|---|---|---|---|---|---|---|---|---|---|---|----------------------|---|---|--|---|----------|---|---|
| 263 | <i>N. groschopfii</i> Hustedt 1939                        | 65  |   |   |   |   |   |   |   |   |   |   |   |   |   |   |                      |   |   |  |   | +        |   |   |
| 264 | <i>N. laterostrata</i> Hustedt 1925                       | –   |   |   |   |   |   |   |   |   |   |   | + |   |   |   |                      |   |   |  |   |          |   |   |
| 265 | <i>N. massadaea</i> Ehrlich 1978                          | 180 |   |   |   |   |   |   |   |   |   |   |   |   |   | + |                      |   |   |  |   |          |   |   |
| 266 | <i>N. mediocostata</i> E.Reichardt 1988                   | 174 |   |   |   |   |   |   |   |   |   |   |   |   |   |   |                      |   |   |  |   | +        |   |   |
| 267 | <i>N. menisculus</i> Schumann 1867                        | 110 | + | + | + |   |   |   |   |   |   |   | + |   |   |   |                      |   |   |  |   |          |   |   |
| 268 | <i>N. microdigitoradiata</i> Lange-Bertalot 1993          | 65  | + |   |   |   |   |   |   |   |   |   |   |   | + |   |                      |   |   |  |   | +<br>cf. |   |   |
| 269 | <i>N. cf. microcari</i> Lange-Bertalot 1993               | 74  |   |   |   |   |   |   |   |   |   |   |   |   |   |   |                      |   |   |  |   | +        |   |   |
| 270 | <i>N. oligotrappenta</i> Lange-Bertalot et G.Hofmann 1993 | –   |   |   |   |   |   |   |   |   |   |   | + |   |   |   |                      |   |   |  |   |          |   |   |
| 271 | <i>N. pargemina</i> G.J.C.Underwood et M.L.Yallopp 1994   | 130 |   |   |   |   |   |   |   |   |   |   |   | + | * |   |                      |   |   |  |   |          |   |   |
| 272 | <i>N. cf. pavillardii</i> Hustedt 1939                    | 174 |   |   |   |   |   |   |   |   |   |   |   |   |   |   |                      |   |   |  |   | +        |   |   |
| 273 | <i>N. pennata</i> A.W.F.Schmidt 1876 var. <i>pennata</i>  | 67  | + |   |   |   |   |   |   |   |   |   |   |   |   |   |                      |   |   |  |   |          |   |   |
| 274 | <i>N. pennata</i> var. <i>pontica</i> Mereschkowsky 1902  | 340 | + |   | + | + | + | + | + |   |   |   |   |   |   |   |                      |   |   |  |   |          |   |   |
| 275 | <i>N. perminuta</i> Grunow 1880                           | 67  |   |   |   |   |   |   |   | + |   |   |   |   |   |   |                      |   |   |  |   | +        |   |   |
| 276 | <i>N. peregrina</i> (Ehrenberg) Kützing 1844              | 272 |   |   |   |   |   |   |   |   | + |   |   |   |   |   |                      |   | + |  |   |          |   |   |
| 277 | <i>N. phyllepta</i> Kützing 1844                          | 150 |   |   |   |   |   |   |   | + |   |   | + | + | * |   |                      |   |   |  | + |          |   | + |
| 278 | <i>N. phylleptosoma</i> Lange-Bertalot 1999               | 131 |   |   |   |   |   |   |   |   |   |   | + |   |   |   |                      |   |   |  |   |          |   |   |
| 279 | <i>N. radiosa</i> Kützing 1844                            | 180 |   |   |   |   |   |   |   |   |   |   | + |   |   |   |                      |   |   |  |   |          |   |   |
| 280 | <i>N. radiosafallax</i> Lange-Bertalot 1993               | 131 |   |   |   |   |   |   |   |   |   |   | + |   |   |   |                      |   |   |  |   |          |   |   |
| 281 | <i>N. ramosissima</i> (Agardh) P.T. Cleve 1895            | 170 | + |   | + |   |   | + |   |   |   |   | + |   |   |   | +s<br>P-<br>aff<br>· | + |   |  |   | +        |   |   |
| 282 | <i>N. rhynchocephala</i> Kützing 1844                     | –   |   |   |   |   |   |   |   |   |   |   | + |   |   |   |                      |   |   |  |   |          |   |   |
| 283 | <i>N. rhynchotella</i> Lange-Bertalot 1993                | –   |   |   |   |   |   |   |   |   |   |   |   |   |   |   |                      |   | + |  |   |          |   |   |
| 284 | <i>N. reinhardtii</i> (Grunow) Grunow in Van Heurck 1880  | 110 |   |   | + |   |   |   |   |   |   |   |   |   |   |   |                      |   |   |  |   |          |   |   |
| 285 | <i>N. salinarum</i> Grunow in Cleve et Grunow 1880        | 300 |   |   | + | + | + |   |   |   | + | + | + |   |   | + |                      |   | + |  |   | +<br>cf. |   |   |
| 286 | <i>N. salinicola</i> Hustedt 1939                         | 205 |   |   |   |   |   |   |   | + |   |   |   |   | + |   | +<br>sp.<br>aff<br>· |   |   |  | + |          | + |   |

[illegible]



|     |                                                                                                              |     |   |   |   |  |  |   |  |   |   |   |   |   |   |   |   |   |   |   |   |   |   |   |
|-----|--------------------------------------------------------------------------------------------------------------|-----|---|---|---|--|--|---|--|---|---|---|---|---|---|---|---|---|---|---|---|---|---|---|
| 338 | <i>N. perminuta</i> Grunow 1881                                                                              | 113 |   |   |   |  |  |   |  |   |   |   |   |   |   |   |   |   |   |   |   |   |   | + |
| 339 | <i>N. cf. perspicua</i> Cholnoky 1960                                                                        | 140 |   |   |   |  |  |   |  |   |   |   |   |   |   |   |   |   | + |   |   |   |   |   |
| 340 | <i>N. pusilla</i> Grunow 1862                                                                                | 209 | + |   |   |  |  | + |  |   |   |   |   |   |   | + |   |   |   | + |   |   |   |   |
| 341 | <i>N. reimerii</i> Kociolek et Herbst 1992                                                                   | 95  |   |   |   |  |  |   |  |   |   |   |   |   |   |   | + | * |   |   |   |   |   |   |
| 342 | <i>N. rosenstockii</i> Lange-Bertalot 1980                                                                   | 65  |   |   |   |  |  |   |  |   |   |   |   |   |   |   |   |   |   | + |   |   |   |   |
| 343 | <i>N. rhopalodioides</i> Hustedt 1955                                                                        | 50  |   |   |   |  |  |   |  |   |   |   | + | * |   |   |   |   |   |   |   |   |   |   |
| 344 | <i>N. rostellata</i> Hustedt 1956                                                                            | 120 |   |   |   |  |  |   |  |   |   |   |   |   |   | + | + |   |   |   | + |   |   |   |
| 345 | <i>N. scalpelliformis</i> Grunow in Cleve et Grunow 1880                                                     | 240 |   |   |   |  |  |   |  | + |   | + |   | + | * |   |   |   |   | + | + |   | + |   |
| 346 | <i>N. sigma</i> (Kützing) W. Smith 1853 var. <i>sigma</i>                                                    | 240 | + | + | + |  |  | + |  | + | + |   | + |   |   |   | + |   |   | + |   |   | + |   |
| 347 | <i>N. sigma</i> var. <i>interscedens</i> Grunow 1878                                                         | 67  | + |   |   |  |  |   |  | + |   |   |   |   |   |   |   |   |   |   |   |   |   |   |
| 348 | <i>N. sigmaformis</i> Hustedt 1955                                                                           | –   |   |   |   |  |  |   |  |   |   | + |   |   |   |   |   |   |   |   |   |   |   |   |
| 349 | <i>N. sigmoidea</i> (Nitzsch) W.Smith 1853                                                                   | 240 | + |   |   |  |  |   |  | + |   |   |   |   |   |   |   |   |   |   |   |   |   |   |
| 350 | <i>N. stompsii</i> Cholnoky 1963                                                                             | –   |   |   |   |  |  |   |  |   |   |   |   | + |   |   |   |   |   |   |   |   |   |   |
| 351 | <i>N. tenuirostris</i> Mereschowsky 1902                                                                     | 77  | + | + |   |  |  | + |  |   |   | + |   |   |   |   |   |   |   |   |   |   |   |   |
| 352 | <i>Odontella aurita</i> (Lyngbye) C.Agardh 1832                                                              | 98  |   |   |   |  |  |   |  |   |   |   |   |   |   |   |   |   |   |   | + |   |   |   |
| 353 | <i>O. obtusa</i> Kützing 1844                                                                                | –   |   |   |   |  |  |   |  |   |   |   |   |   |   |   |   |   |   |   | + |   |   |   |
| 354 | <i>Odontidium hyemale</i> (Roth) Kützing 1844                                                                | 98  |   |   |   |  |  |   |  |   |   |   |   |   |   |   |   |   |   |   | + |   |   |   |
| 355 | <i>Pantocsekiella ocellata</i> (Pantocsek) K.T.Kiss et Ács 2016                                              | 240 |   |   |   |  |  |   |  | + |   |   |   |   |   |   |   | + | * |   |   |   |   |   |
| 356 | <i>Paralia sulcata</i> (Ehrenberg) Cleve 1873                                                                | 205 |   |   |   |  |  |   |  |   |   |   | + |   |   |   |   |   |   |   |   | + |   |   |
| 357 | <i>Parlibellus cruciculoides</i> (C.Brockmann) Witkowski, Lange-Bertalot et Metzeltin 2000                   | –   |   |   |   |  |  |   |  |   |   |   |   | + |   |   |   |   |   |   |   |   |   |   |
| 358 | <i>P. delognei</i> (Van Heurck) E.J. Cox 1988                                                                | 100 | + | + |   |  |  |   |  |   |   |   |   |   |   |   |   |   |   |   |   |   |   |   |
| 359 | <i>Petroneis humerosa</i> (Brébisson ex W.Smith) Stickle et D.G.Mann in Round, R.M.Crawford et D.G.Mann 1990 | 240 |   |   | + |  |  |   |  | + |   |   |   |   |   |   |   |   |   |   |   |   |   |   |
| 360 | <i>Pinnularia appendiculata</i> (C.Agardh) Schaarschmidt 1881                                                | 61  |   |   |   |  |  |   |  |   |   |   |   |   |   |   |   |   |   |   |   |   | + |   |
| 361 | <i>P. borealis</i> Ehrenberg 1843                                                                            | –   |   |   |   |  |  |   |  |   |   |   |   |   |   |   |   | + |   |   |   |   |   |   |

|     |                                                                            |     |   |   |   |  |  |  |  |   |   |  |  |   |   |   |  |  |   |   |  |   |   |   |   |
|-----|----------------------------------------------------------------------------|-----|---|---|---|--|--|--|--|---|---|--|--|---|---|---|--|--|---|---|--|---|---|---|---|
| 362 | <i>P. brebissonii</i> (Kützing) Rabenhorst 1864                            | –   |   |   |   |  |  |  |  |   |   |  |  |   |   |   |  |  | + |   |  |   |   |   |   |
| 363 | <i>P. cruciformis</i> (Donkin) Cleve 1895                                  | 110 |   |   | + |  |  |  |  |   |   |  |  |   |   |   |  |  |   |   |  |   |   |   |   |
| 364 | <i>P. microstauron</i> (Ehrenberg) Cleve 1891                              | 96  |   |   |   |  |  |  |  |   |   |  |  | + |   | + |  |  |   |   |  |   |   |   | + |
| 365 | <i>P. viridis</i> (Nitzsch) Ehrenberg 1843                                 | –   |   |   |   |  |  |  |  |   |   |  |  |   |   |   |  |  | + |   |  |   |   |   |   |
| 366 | <i>P. quadrata</i> (A.W.F.Schmidt) Cleve 1895                              | 165 |   |   |   |  |  |  |  |   |   |  |  |   |   |   |  |  |   |   |  |   |   | + |   |
| 367 | <i>Pinnunavis elegans</i> (W.Smith) Okuno 1975                             | –   |   |   |   |  |  |  |  |   |   |  |  |   |   | + |  |  |   |   |  |   |   |   |   |
| 368 | <i>Plagiogramma pulchellum</i> Greville 1859                               | 98  |   |   |   |  |  |  |  |   |   |  |  |   |   |   |  |  |   |   |  |   | + |   |   |
| 369 | <i>P. gibberula</i> Grunow 1880                                            | –   |   |   |   |  |  |  |  |   |   |  |  | + |   |   |  |  |   |   |  |   |   |   |   |
| 370 | <i>Plagiotropis lepidoptera</i> (W.Gregory) Kuntze 1898                    | 98  |   |   |   |  |  |  |  |   |   |  |  |   |   |   |  |  |   |   |  |   | + |   |   |
| 371 | <i>Planothidium delicatulum</i> (Kützing) Round et Bukhtiyarova 1996       | 67  |   |   |   |  |  |  |  |   |   |  |  |   |   |   |  |  |   |   |  | + |   |   |   |
| 372 | <i>P. dubium</i> (Grunow) Round et Bukhtiyarova 1996                       | –   |   |   |   |  |  |  |  | + |   |  |  |   |   | + |  |  |   |   |  |   |   |   |   |
| 373 | <i>P. engelbrechtii</i> (Cholnoky) Round et Bukhtiyarova 1996              | –   |   |   |   |  |  |  |  |   |   |  |  | + |   |   |  |  |   |   |  |   |   |   |   |
| 374 | <i>P. frequentissimum</i> (Lange-Bertalot) Lange-Bertalot 1999             | –   |   |   |   |  |  |  |  |   |   |  |  |   |   | + |  |  |   |   |  |   |   |   |   |
| 375 | <i>P. hauckianum</i> (Grunow) Bukhtiyarova 1999                            | 150 |   |   |   |  |  |  |  |   |   |  |  | + |   |   |  |  |   |   |  |   | + |   |   |
| 376 | <i>P. lanceolatum</i> (Brébisson ex Kützing) Lange-Bertalot 1999           | 272 |   |   |   |  |  |  |  |   | + |  |  |   |   |   |  |  |   |   |  | + |   |   |   |
| 377 | <i>P. quarnerensis</i> (Grunow) Witkowski, Lange-Bertalot et Metzelin 2000 | 240 |   |   |   |  |  |  |  |   | + |  |  |   |   |   |  |  |   |   |  |   |   |   |   |
| 378 | <i>Pleurosigma aestuarii</i> (Brébisson ex Kützing) W.Smith 1853           | 110 |   |   | + |  |  |  |  |   |   |  |  |   |   |   |  |  |   |   |  |   |   |   |   |
| 379 | <i>P. affine</i> Grunow 1880                                               | –   |   |   |   |  |  |  |  |   |   |  |  | + |   |   |  |  |   |   |  |   |   |   |   |
| 380 | <i>P. angulatum</i> (J.T.Quekett) W.Smith 1852                             | 98  |   |   |   |  |  |  |  |   |   |  |  |   |   |   |  |  |   |   |  |   | + |   |   |
| 381 | <i>P. elongatum</i> W.Smith 1852                                           | 240 | + | + | + |  |  |  |  | + | + |  |  |   |   | + |  |  |   |   |  | + |   |   |   |
| 382 | <i>P. formosum</i> W.Smith 1852                                            | 100 |   |   |   |  |  |  |  |   |   |  |  | + |   |   |  |  |   |   |  |   |   |   |   |
| 383 | <i>P. normanii</i> Ralfs 1861                                              | 98  |   |   |   |  |  |  |  |   |   |  |  |   |   |   |  |  |   |   |  |   | + |   |   |
| 384 | <i>P. salinarum</i> (Grunow) Grunow 1880                                   | 128 |   |   |   |  |  |  |  |   |   |  |  | + |   | + |  |  |   |   |  | + |   |   |   |
| 385 | <i>P. strigosum</i> W.Smith 1852                                           | 50  |   |   |   |  |  |  |  |   |   |  |  | + |   |   |  |  |   |   |  |   |   |   |   |
| 386 | <i>Praestephanos carconensis</i> (Grunow) A.Tuji 2014                      | 95  |   |   |   |  |  |  |  |   |   |  |  |   |   |   |  |  | + | * |  |   |   |   |   |
| 387 | <i>Proschkinia bulnheimii</i> (Grunow) Karayeva 1978                       | 92  |   |   |   |  |  |  |  |   |   |  |  |   | + | + |  |  |   |   |  | + |   |   | + |



[illegible]

[illegible]

|     |                                                                                |     |        |        |        |   |        |        |    |   |        |    |          |         |    |    |    |    |    |    |    |    |    |    |    |    |
|-----|--------------------------------------------------------------------------------|-----|--------|--------|--------|---|--------|--------|----|---|--------|----|----------|---------|----|----|----|----|----|----|----|----|----|----|----|----|
| 437 | <i>Toxarium undulatum</i> J.W. Bailey 1854                                     | 110 |        | +      | +      |   |        |        |    |   |        |    |          |         |    |    |    |    |    |    |    |    |    |    |    |    |
| 438 | <i>Trachyneis aspera</i> (Ehrenberg) Cleve 1894                                | 98  |        |        | +      |   |        |        |    |   |        |    |          |         |    |    |    |    |    |    | +  |    |    |    |    |    |
| 439 | <i>T. intermedium</i> (Grunow ex A.W.F.Schmidt) L.W.Bailey 1924                | –   |        |        |        |   |        |        |    |   |        |    |          |         | +* |    |    |    |    |    |    |    |    |    |    |    |
| 440 | <i>Triceratium favus</i> var. <i>pentagona</i> Tempère et Peragallo 1909       | 98  |        |        |        |   |        |        |    |   |        |    |          |         |    |    |    |    |    |    | +  |    |    |    |    |    |
| 441 | <i>Tryblionella aerophila</i> (Hustedt) D.G.Mann 1990                          | 174 |        |        |        |   |        |        |    |   |        |    |          |         |    |    |    |    |    |    |    | +  |    |    |    |    |
| 442 | <i>T. acuminata</i> W. Smith 1853                                              | 272 | +      |        | +      |   |        | +      |    |   | +      |    | +        | +       |    |    |    |    |    |    |    |    |    |    |    |    |
| 443 | <i>T. apiculata</i> Gregory 1857                                               | 205 |        | +      | +      |   |        |        |    |   |        |    | +        |         |    | +  |    |    | +  |    |    |    |    |    |    |    |
| 444 | <i>T.</i> cf. <i>ardua</i> (Cholnoky) D.G.Mann 1990                            | 54  |        |        |        |   |        |        |    |   |        |    |          | +*      |    |    |    |    |    |    |    |    |    |    |    |    |
| 445 | <i>T. balatonis</i> (Grunow) D.G.Mann 1990                                     | 131 |        |        |        |   |        |        |    |   |        |    | +        |         |    |    |    |    |    |    |    |    |    |    |    |    |
| 446 | <i>T. compressa</i> (Bailey) Poulin 1990                                       | 272 |        |        |        |   |        |        |    | + | +      |    |          |         |    |    |    |    |    |    |    | +  |    |    |    |    |
| 447 | <i>T. gracilis</i> W.Smith 1853                                                | –   |        |        |        |   |        |        |    |   |        |    | +        |         |    |    |    |    |    |    |    |    |    |    |    |    |
| 448 | <i>T. granulata</i> (Grunow) D.G.Mann in Round, R.M.Crawford et D.G.Mann 1990  | 75  |        |        |        |   |        |        |    |   |        |    |          | +       |    |    |    |    |    |    |    |    |    |    |    |    |
| 449 | <i>T. hungarica</i> (Grunow) Frenguelli 1942                                   | 145 |        |        |        |   |        |        |    |   |        |    | +        |         |    |    |    | +  |    | +  |    |    | +  |    |    |    |
| 450 | <i>T. hantzschiana</i> Grunow 1862                                             | –   |        |        |        |   |        |        |    |   |        |    | +        |         |    |    |    |    |    |    |    |    |    |    |    |    |
| 451 | <i>T. hyalina</i> (Amossé) T.Ohtsuka 2005                                      | –   |        |        |        |   |        |        |    |   |        |    |          |         |    |    |    |    |    |    |    | +  |    |    |    |    |
| 452 | <i>T. navicularis</i> (Brébisson) Ralfs in Pritchard 1861                      | 290 |        |        |        |   | +      |        |    |   |        |    |          |         |    |    |    |    |    |    |    |    |    |    |    |    |
| 453 | <i>T. punctata</i> W.Smith 1853                                                | 300 | +      |        | +      |   | +      |        |    | + |        |    | +        | +       |    | +  |    |    |    | +  |    |    |    |    |    |    |
| 454 | <i>Vanheureckia interposita</i> var. <i>incomperta</i> (Lewis) Frenguelli 1924 | –   |        |        |        |   |        |        |    |   |        |    |          | +*      |    |    |    |    |    |    |    |    |    |    |    |    |
| 455 | <i>Ulnaria acus</i> (Kützinger) Aboal 2003                                     | 95  |        |        |        |   |        |        |    |   |        |    |          |         |    |    |    | +  | *  |    |    |    |    |    |    |    |
| 456 | <i>U. ulna</i> (Nitzsch) Compère 2001                                          | 240 |        |        |        |   |        |        |    | + | +      |    | +c<br>f. |         |    |    |    |    | +  | +  |    | +  |    |    |    |    |
| 457 | <i>Undantella lineolata</i> (Ehrenberg) L.I. Ryabushko 2006                    | 101 | +      |        |        |   |        |        |    |   |        |    |          |         |    |    |    |    |    | +  |    | +  | *  |    |    |    |
| 458 | <i>Zygoceros rhombus</i> Ehrenberg 1839                                        | –   |        |        |        |   |        |        |    |   |        |    |          |         |    |    |    |    |    |    |    | +  |    |    |    |    |
|     | Total number                                                                   |     | 5<br>1 | 2<br>7 | 5<br>7 | 6 | 1<br>0 | 1<br>1 | 19 | 3 | 3<br>9 | 67 | 12       | 13<br>9 | 49 | 19 | 43 | 11 | 30 | 56 | 23 | 60 | 56 | 41 | 28 | 17 |

Crimean waterbodies: 1 – Lake Chersonesskoye, 2 – Bay Sivash, 3 – Lake Bakalskoye, 4 – small lake near Bay Cozachyia, 5 – Lake Marfovskoye, 6 – Lake Koyashskoye, 7 – Lake Tobechikskoye, 8 – Lake Shimakhanskoye, and others: 9 – Lagoon Kuyalnitsky Liman; 10 – Kara-Bogaz-Gol Bay, Caspian Sea; 11 – Sal-Iletsk Lakes (Razval, Dunino, and Tuzluchnoye), Orenburg Oblast, Russia; 12 – The Aral Sea; 13 – La Poza pond, \* – Guerrero Negro, Baja California Sur, Mexico; 14 – Spain; 15 – South-West Western Australia; 16 – Dead Sea; 17 – Great Salt Plains, \* – Mono Lake, USA; 18 – Great Salt Lake, USA; 19 – Greece; 20 – Araruama Lagoon, \* – Vermelha lagoon, Brazil; 21 – India; 22 – Korea; 23 – lakes from the Kamloops and Cariboo/Chilcotin regions of British Columbia, Canada; 24 – hypersaline lakes in the Rauer Islands, eastern Antarctica.
